# Supplementary material for: Hydrogen-bonding driven luminescent assembly and efficient Förster Resonance Energy Transfer (FRET) in a dialkoxynaphthalene-based organogel
Source: Royal Society of Chemistry journal article supplement (doi:10.1039/c4ra08920k), 2014-09-03
Supplement: c4ra08920k1.pdf [file c4ra08920k1.pdf]

Supporting Information for:

## Hydrogen-bonding Driven Luminescent Assembly and Efficient Förster Resonance Energy Transfer (FRET) in Dialkoxynaphthalene-Based Organogel

Dipankar Basak, Anindita Das and Suhrit Ghosh\*

Indian Association for the Cultivation of Science, Polymer Science Unit  
2A & 2B Raja S. C. Mullick Road, Kolkata, India-700032

\*Corresponding author Email: [psusg2@iacs.res.in](mailto:psusg2@iacs.res.in)

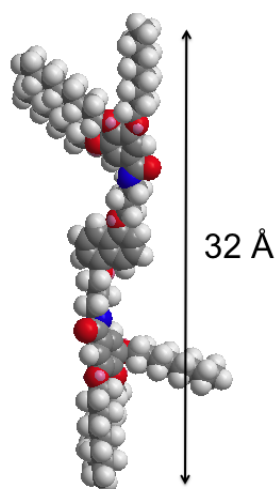

**Fig. S1:** Energy minimized structure of **DAN-1** obtained by molecular modeling using Chem 3D-ultra 8 using MM2 for energy minimization

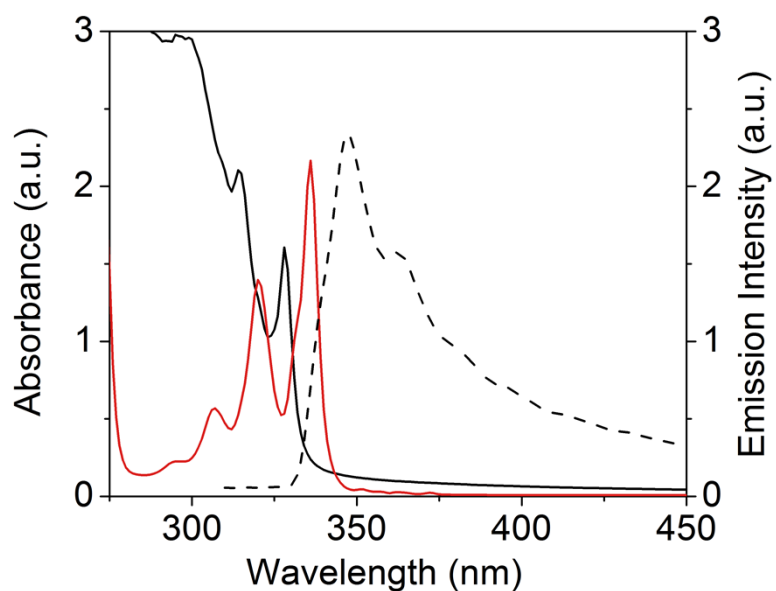

**Fig. S2:** Absorption (black solid line) and emission spectra (black dotted line) of **DAN-1** gel (in MCH, 2.0 mM) and absorption spectra (red solid line) of pyrene in MCH ( $2.0 \times 10^{-4}$  M)

**Table S1:** Fluorescence lifetime data for **DAN-1** in (a) gel state (in MCH, 2 mM) and (b) sol State (in THF, 2 mM)  $\lambda_{\text{ex}} = 295$  nm, emission was monitored at 346 nm

| Sample | Component Lifetimes (ns) <sup>a</sup> |            |                     |
|--------|---------------------------------------|------------|---------------------|
|        | $\tau_1$                              | $\tau_2$   | $\tau_{\text{avg}}$ |
| a) Gel | 3.09 (48 %)                           | 6.07 (52%) | 5.11                |
| b) Sol | 7.2 (100%)                            |            | 7.2                 |

<sup>a</sup>Values in parenthesis shows the decay contribution in each life times. Average life time (in the gel state) was calculated using the following equation[1]:  $\tau_{\text{avg}} = (a_1\tau_1^2 + a_2\tau_2^2) / (a_1\tau_1 + a_2\tau_2)$

#### Reference

1. Lakowicz JR (1999) Principles of Fluorescence Spectroscopy (2nd ed.). Kluwer Academic/Plenum Publishers, New York.
